# Supplementary material for: Microtubules Accelerate the Kinase Activity of Aurora-B by a Reduction in Dimensionality
Source: PubMed Central journal article supplement (PMC3912212; doi:10.1371/journal.pone.0086786), 2014-02-03
Supplement: pone.0086786.s001.pdf [file pone.0086786.s001.pdf]

# Microtubules accelerate the kinase activity of Aurora-B by a reduction in dimensionality

Michael Noujaim<sup>1</sup>, Susanne Bechstedt<sup>1</sup>, Michal Wieczorek<sup>1</sup>, Gary J. Brouhard<sup>1,\*</sup>

<sup>1</sup> Department of Biology, McGill University, Montréal, Québec, Canada

\* E-mail: gary.brouhard@mcgill.ca

## Supplemental Information

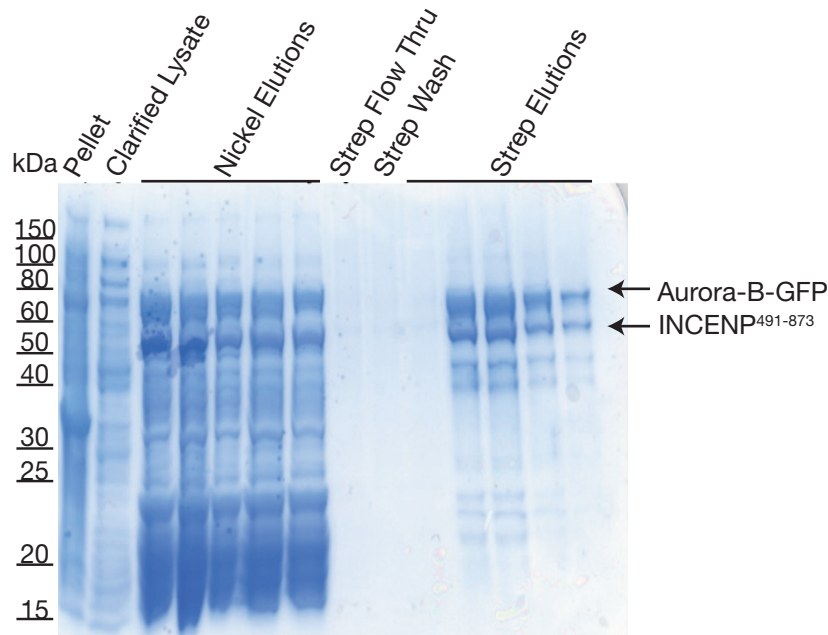

**Figure S1. Purification of CCA-GFP.** An SDS-PAGE gel from a purification of the CCA-GFP. The two proteins in the complex are initially visible in the elutions from the Ni-NTA column (Nickel Elutions, labeled). The complex is further purified using the Strep-tactin column (Strep Elutions, labeled).

## CCA Auto-activation Model

Following the formulation of Wang and Wu [1], an intermolecular autophosphorylation reaction scheme can be shown as:

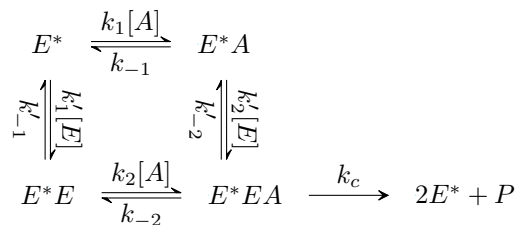

where  $E$ ,  $E^*$ ,  $A$ , and  $P$  are unphosphorylated kinase, phosphorylated kinase, ATP and ADP, respectively. Equilibrium dissociation constants are defined as:

$$\begin{aligned} K'_A &= \frac{[E^*][A]}{[E^*A]} = \frac{k_{-1}}{k_1} \\ K'_E &= \frac{[E^*][E]}{[E^*E]} = \frac{k'_{-1}}{k'_1} \\ K_A &= \frac{[E^*E][A]}{[E^*EA]} = \frac{k_{-2}}{k_2} \\ K_E &= \frac{[E^*A][E]}{[E^*EA]} = \frac{k'_{-2}}{k'_2} \end{aligned}$$

It should be noted that  $K_A K'_E = K'_A K_E$ . The Michaelis-Menten constant,  $K_M$  and turnover rate,  $k_{cat}$ , are:

$$K_M = K_E \frac{(K'_A + [A])}{(K_A + [A])} \quad (1)$$

and

$$k_{cat} = \frac{k_c[A]}{K_A + [A]} \quad (2)$$

Certain assumptions simplify Equations 1 and 2. First, we assume that  $E^*$  and  $E^*A$  bind to  $E$  with the same affinity, which is to say that ATP does not change the affinity. Then  $K_E = K'_E$ , which means that  $K_A = K'_A$  and therefore Equation 1 reduces to  $K_M = K_E$ . Second, we assume that  $[A]$  is sufficiently high relative to all other species (at least 100  $\mu\text{M}$  used in experiments) so that Equation 2 reduces to  $k_{cat} = k_c$ .

To solve the scheme, let the total concentration of kinase be  $[T]_0 = [E]_0 + [E^*]_0 = [E] + [E^*] + [E^*A] + 2[E^*E] + 2[E^*EA]$ , where  $[E]_0$  and  $[E^*]_0$  are the initial concentrations of unphosphorylated and phosphorylated kinase, respectively. The above simplifications let us write the implicit integrated rate equation found in [1] as:

$$t = \frac{-1}{k_c} \left( \ln \frac{x}{x_0} + \frac{K_E + [T]_0}{[T]_0} \ln \frac{(x - K_E - 2[T]_0)(x_0 - K_E)}{(x_0 - K_E - 2[T]_0)(x - K_E)} \right) \quad (3)$$

where

$$x = 2[E^*]_T - [T]_0 + \sqrt{([T]_0 + K_E)^2 - 4([T]_0 - [E^*]_T)[E^*]_T} \quad (4)$$

and

$$x_0 = 2[E^*]_0 - [T]_0 + \sqrt{([T]_0 + K_E)^2 - 4[E^*]_0[E]_0} \quad (5)$$

The tunable parameters  $K_M$  and  $k_{cat}$  are now  $K_E$  and  $k_c$ , the dissociation constant for unphosphorylated-phosphorylated CCA complex formation, and the first-order rate constant for the catalytic phosphorylation reaction, respectively. In our model, microtubules increase the rate of formation of  $[E^*]_T$  by increasing CCA collision rates (increasing  $k'_1$  and/or  $k'_2$ , which means decreasing  $K_E$  and/or  $K'_E$ ) through a reduction in dimensionality. An example plot of  $[E^*]_T$  as a function of  $t$  using Equation 3 is shown below. Here,  $[E^*]_0 = 0.1 \mu\text{M}$ ,  $[E]_0 = 0.9 \mu\text{M}$ ,  $k_c = 1 \text{ min}^{-1}$  and  $K_E$  is varied.

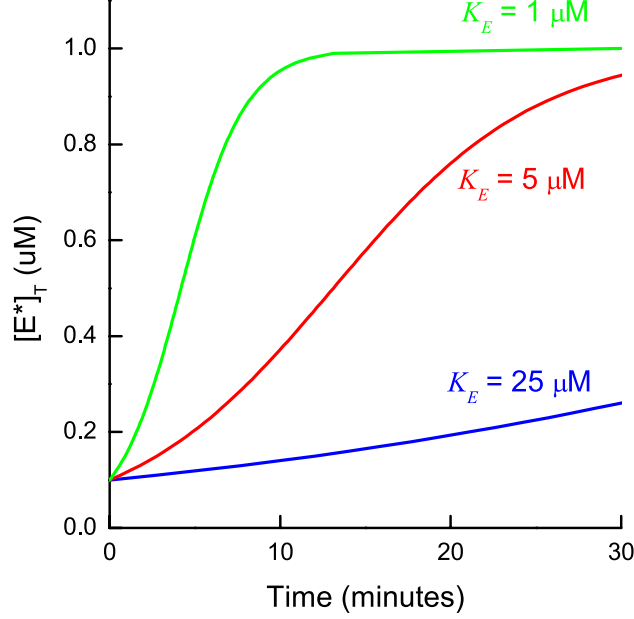

### Reduction in Dimensionality

From Berg and Purcell [2, 3], let  $W(r)$  be the time it takes for a particle to encounter an absorbing sphere of radius  $a$ . A reflecting boundary exists at  $r = b > a$ . In general,  $W$  is described by:

$$\nabla^2 W + \frac{1}{D_n} = 0 \quad (6)$$

where  $D_n$  is the diffusion coefficient in  $n$ -dimensions. In 3-dimensions, the solution for  $W(r)$  with the above boundary conditions ( $W(r = a) = 0$  and  $\nabla W(r = b) = 0$ ) is given by:

$$W(r) = \frac{\frac{2b^3}{a} - \frac{2b^3}{r} + a^2 - r^2}{6D_3} \quad (7)$$

Here,  $D_3$  is the diffusion coefficient in 3-dimensions. We want the *mean* of this so-called ‘‘first passage time’’, or  $\tau_{\text{MFPT}}$ . This is the average of  $W(r)$  when the particle is placed at random inside the volume many times and is defined as:

$$\tau_{\text{MFPT}} = \frac{1}{\pi(b^2 - a^2)} \int_a^b W(r) dr = \frac{b^6}{3D_3 a(b^3 - a^3)} \left( 1 - \frac{9a}{5b} + \frac{a^3}{b^3} - \frac{a^6}{5b^6} \right)$$

and when  $b \gg a$ ,  $\tau_{\text{MFPT}} \approx \frac{b^3}{3aD_3}$  (8)

Let the particle be a phosphorylated CCA molecule and the absorbing sphere an unphosphorylated CCA. If we assume  $a \approx 2$  nm (radius of a typical globular protein) and the viscosity  $\eta \approx 1$  cP, then from the Einstein-Stokes relation we can estimate  $D_3 = \frac{k_B T}{6\pi\eta r} \approx 10 \mu\text{m}^2 \text{ s}^{-1}$  at 25°C. Both the particle and the absorbing sphere undergo diffusion, however, which means that the relative diffusion coefficient is  $D_3 = D_{\text{particle}} + D_{\text{absorbing sphere}}$ . Assuming that phosphorylation does not affect diffusion coefficients,  $D_{\text{particle}} = D_{\text{absorbing sphere}}$ , and  $D_3 \approx 20 \mu\text{m}^2 \text{ s}^{-1}$ .

In the 1-dimensional case, Equation 6 becomes:

$$\frac{d^2 W(x)}{dx^2} + \frac{1}{D_1} = 0 \quad (9)$$

where  $D_1$  is the 1-dimensional diffusion coefficient (which we have measured for CCA using single-molecule TIRF). We imagine that a CCA molecule diffuses along the  $x$ -axis at  $0 < x \leq b$ .  $x = 0$  is an absorbing point, and  $x = b$  is a

reflecting boundary, as in the 3-dimensional case. The boundary conditions to solve Equation 9 are  $W(x = 0) = 0$ , and  $\frac{dW(x=b)}{dx} = 0$ . The solution is:

$$W(x) = \frac{1}{2D_1}(2bx - x^2)$$

The mean first passage time for the 1D case is  $\frac{1}{b-a} \int_a^b W(x)dx = \boxed{\tau_{\text{MFPT}} = \frac{b^2}{3D_1}}$ .

We are interested in knowing if 1D diffusion produces smaller mean first passage times than in 3D. The equations for  $\tau_{\text{MFPT}}$ , however, both depend on  $b$ , the separation distance between the absorbing and reflective boundaries. We can solve for a value of  $b$  for which  $\tau_{\text{MFPT in 1D}} < \tau_{\text{MFPT in 3D}}$ :

$$b > a \frac{D_3}{D_1} \tag{10}$$

which, using the above values for the diffusion coefficients and  $a \approx 2$  nm, gives  $b > 0.4 \mu\text{m}$ . The dependency on the value of  $b$  is clearly shown in Figure 3D of the main paper.

### Supplementary References

- [1] Z. X. Wang and J. W. Wu. Autophosphorylation kinetics of protein kinases. *Biochem J*, 368:947–952, 2002.
- [2] H. C. Berg and E. M. Purcell. Physics of chemoreception. *Biophys J*, 20(2):193–219, 1977.
- [3] H. C. Berg. *Random Walks in Biology*. Princeton University Press, 1993.
